# Supplementary material for: Effect of Caloric Restriction Combined with Probiotic Supplementation on Parameters Related to Weight Loss, Homeostatic, and Hedonic Systems of Food Intake in Adult Men Living with Obesity: Secondary Data from a Randomized, Parallel, Double-Blind, Placebo-Controlled Clinical Trial
Source: Research Square preprint supplement (doi:10.21203/rs.3.rs-5560365/v1), 2024-12-09
Supplement: Supplementary file 1 [file 875a675ce02b8b8d1f7e5f0b.docx]

**Supplementary Data**

**Supplementary Table 1.** Missing data and power according to the outcome assessed.

| **Parameter** | **Randomized** | **Analyzed** | **partial n2; Power** |
| --- | --- | --- | --- |
| **Body weight (kg)** | 33 (CRPLA= 17; CRPRO= 16) | 25 (CRPLA= 12; CRPRO= 13) | 0.734; 1.00 |
| **BMI (kg/m2)** | 33 (CRPLA= 17; CRPRO= 16) | 25 (CRPLA= 12; CRPRO= 13) | 0.745; 1.00 |
| **Fat-free mass (kg)** | 33 (CRPLA= 17; CRPRO= 16) | 25 (CRPLA= 12; CRPRO= 13) | 0.134; 0.27 |
| **Fat mass (kg)** | 33 (CRPLA= 17; CRPRO= 16) | 25 (CRPLA= 12; CRPRO= 13) | 0.748; 1.00 |
| **Fat mass (%)** | 33 (CRPLA= 17; CRPRO= 16) | 25 (CRPLA= 12; CRPRO= 13) | 0.625; 0.99 |
| **Ghrelin (pg/mL)** | 33 (CRPLA= 17; CRPRO= 16) | 25 (CRPLA= 12; CRPRO= 13) | 0.113; 0.27 |
| **Leptin (ng/mL)** | 33 (CRPLA= 17; CRPRO= 16) | 25 (CRPLA= 11; CRPRO= 13) | 0.375; 0.98 |
| **PYY (pg/mL)** | 33 (CRPLA= 17; CRPRO= 16) | 13 (CRPLA= 8; CRPRO= 5) | 0.083; 0.08 |
| **Insulin (μg/L)** | 33 (CRPLA= 17; CRPRO= 16) | 25 (CRPLA= 12; CRPRO= 13) | 0.107; 0.18 |
| **GLP-1 (pg/mL)** | 33 (CRPLA= 17; CRPRO= 16) | 25 (CRPLA= 12; CRPRO= 12) | 0.103; 0.17 |
| **GIP (pg/mL)** | 33 (CRPLA= 17; CRPRO= 16) | 25 (CRPLA= 12; CRPRO= 12) | 0.070; 0.10 |
| **Adiponectin (pg/mL)** | 33 (CRPLA= 17; CRPRO= 16) | 25 (CRPLA= 12; CRPRO= 13) | 0.125; 0.24 |
| **Binge eating (score)** | 33 (CRPLA= 17; CRPRO= 16) | 24 (CRPLA= 11; CRPRO= 13) | 0.413; 0.99 |
| **Emotional eating (score** | 33 (CRPLA= 17; CRPRO= 16) | 24 (CRPLA= 11; CRPRO= 13) | 0.289; 0.87 |
| **Cognitive restraint (score)** | 33 (CRPLA= 17; CRPRO= 16) | 24 (CRPLA= 11; CRPRO= 13) | 0.650; 1.00 |
| **Legend:** CRPLA: caloric restriction with placebo supplementation; CRPRO: caloric restriction with probiotic supplementation. BMI: body mass index; PYY: peptide YY; GLP-1: glucagon-like peptide 1; GIP: gastric inhibitory peptide; kg: kilograms; m²: square meters; pg/mL: picograms per milliliter; ng/mL: nanograms per milliliter; µg/mL: micrograms per milliliter. | | | |

**Supplementary Table 2.** Data on energy and macronutrient intake throughout the intervention.

| **Variable** | **CRPLA (mean; 95% CI)** | | | | **CRPRO (mean; 95% CI)** | | | **CRPLA vs CRPRO** | | |
| --- | --- | --- | --- | --- | --- | --- | --- | --- | --- | --- |
|  | **Baseline** | **12 weeks** | **p-value** | **Baseline** | | **12 weeks** | **p-value** | **MD between groups (95% CI)** | | **p-value; η2ρ** |
| **Energy intake (kcal/day)** | 2929 (2668 – 3189) | 2063 (1881 – 2244) | **< 0.001** | 2696 (2427 – 2965) | | 1962 (1763 – 2161) | **< 0.001** | 100.0 | (-155 to 356) | 0.470; 0.023 |
| **Energy deficit (kcal/day) from TDEE** | - | -1390 (-1755 to -1025) | **-** | **-** | | -1400 (-1587 to -1213) | **-** | 10.54 | -367 to 388 | 0.955; 0.022 |
| **Energy deficit (kcal/day) from baseline energy intake** | - | -866 (-1184 to -549) | **-** | **-** | | -734 (-976 to – 491) | - | 132 | (-506 to 241) | 0.470; 0.294# |
| **Carbohydrates (%)** | 44.6 (44.4 – 44.7) | 45.7 (41.7 – 48.4) | 1.000 | 44.9 (44.7 – 45.1) | | 47.0 (43.9 – 50.2) | 0.964 | 1.97 | -6.22 to 2.35 | 0.447; 0.025 |
| **Protein (%)** | 20.2 (18.9 – 21.5) | 23.7 (22.3 – 25.2) | **<0.001** | 19.3 (18.4 – 20.1) | | 22.4 (21.6 – 23.2) | **<0.001** | 1.36 | -0.17 to 2.90 | 0.580; 0.014 |
| **Total fat (%)** | 35.5 (35.3 – 35.7) | 30.4 (27.6 – 33.1) | **0.005** | 35.3 (35.2 – 35.5) | | 30.9 (28.1 – 33.7) | **0.013** | 0.56 | -4.3 to 3.17 | 0.704; 0.006 |
| **Saturated fat (%)** | 13.4 (12.4 – 14.4) | 9.79 (8.01 – 11.6) | **0.004** | 12.9 (12.1 – 13.6) | | 9.78 (8.22 – 11.3) | **0.012** | 0.01 | -2.2 to 2.23 | 0.692; 0.007 |
| **Monounsaturated fat (%)** | 12.2 (11.6 – 12.8) | 11.7 (10.7 – 12.7) | 1.000 | 11.7 (11.1 – 12.2) | | 11.9 (10.9 – 13.0) | 1.000 | 0.23 | -1.62 to 1.16 | 0.401; 0.031 |
| **Polyunsaturated fat (%)** | 7.28 (6.77 – 7.78) | 5.88 (5.62 – 6.15) | **<0.001** | 7.43 (6.94 – 7.92) | | 6.09 (5.87 – 6.30) | **<0.001** | 0.20 | -0.51 to 0.11 | 0.895; 0.001 |
| **Total fiber (g)** | 19.9 (17.6 – 22.2) | 22.9 (17.7 – 28.2) | 1.000 | 18.8 (15.9 – 21.6) | | 25.0 (17.4 – 32.5) | 0.156 | 2.01 | -10.87 to 6.84 | 0.416; 0.029 |
| **Soluble fiber (g)** | 5.55 (5.48 – 5.62) | 5.79 (4.57 – 7.00) | 1.000 | 5.58 (5.49 – 5.66) | | 6.52 (4.90 – 8.15) | 0.934 | 0.73 | -2.68 to 1.21 | 0.453; 0.025 |
| **Insoluble fiber (g)** | 14.3 (12.0 – 16.7) | 17.2 (13.0 – 21.4) | 1.000 | 12.9 (10.2 – 15.6) | | 18.4 (12.4 – 24.4) | 0.072 | 1.21 | -8.27 to 5.84 | 0.377; 0.034 |
| **Legend:** CRPLA: caloric restriction with placebo supplementation; CRPRO: caloric restriction with probiotic supplementation; TDEE: Total daily energy intake; g: grams; % percentage. #effect size from Cohen *d* (t test to verify the difference of energy deficit after 12 weeks). ANOVA for repeated measures followed by Bonferroni post-hoc test. In **bold** significant differences. | | | | | | | | | | |
